# Supplementary material for: Removal of abamectin and conventional pollutants in vertical flow constructed wetlands with Fe-modified biochar
Source: Royal Society of Chemistry journal article supplement (doi:10.1039/d0ra08265a), 2020-01-01
Supplement: d0ra08265a1.pdf [file d0ra08265a1.pdf]

Table S1 Characteristic of the influence water

|                      | NH <sub>4</sub> -N | COD    | TP   | pH          |
|----------------------|--------------------|--------|------|-------------|
| Concentration (mg/L) | 10-20              | 50-200 | 5-10 | 7.51 ± 0.15 |

Table S2 Statistical table of genetic diversity

| Height/cm | Sample | OTUs    | Shannon   | Simpson  |
|-----------|--------|---------|-----------|----------|
| 80        | CW1-80 | 1374204 | 12.4097   | 0.000023 |
|           | CW2-80 | 1412532 | 13.017767 | 0.000008 |
|           | CW3-80 | 1695305 | 12.820155 | 0.000019 |
|           | CW4-80 | 1368255 | 11.948025 | 0.000064 |
| 20        | CW1-20 | 1491461 | 13.034722 | 0.000007 |
|           | CW2-20 | 1209483 | 12.306531 | 0.000021 |
|           | CW3-20 | 1335816 | 12.889573 | 0.000009 |
|           | CW4-20 | 1213775 | 12.530142 | 0.000015 |

(Samples with heights of 20-30 cm and 70-80 cm were selected from four constructed wetlands which were named CW1-80, CW2-80, CW3-80, CW4-80, CW1-20, CW2-20, CW3-20, CW4-20.)

Table S3 Removal rate of abamectin in each sampling mouth of four simulated constructed wetlands

| Name             | High (cm) | Removal rate (%) | Name             | High (cm) | Removal rate (%) | Name             | High (cm) | Removal rate (%) | Name             | High (cm) | Removal rate (%) |
|------------------|-----------|------------------|------------------|-----------|------------------|------------------|-----------|------------------|------------------|-----------|------------------|
| CW-1<br>Period 1 | 5         | 13.06%±5.56%     | CW-2<br>Period 1 | 5         | 35.73%±6.98%     | CW-3<br>Period 1 | 5         | 93.62%±1.99%     | CW-4<br>Period 1 | 5         | 89.42%±1.67%     |
|                  | 25        | 23.61%±11.94%    |                  | 25        | 57.15%±1.97%     |                  | 25        | 61.15%±4.34%     |                  | 25        | 61.98%±1.29%     |
|                  | 45        | 26.86%±5.75%     |                  | 45        | 62.53 %±2.84%    |                  | 45        | 75.43 %±3.34%    |                  | 45        | 72.66 %±0.81%    |
|                  | 65        | 51.35%±6.53%     |                  | 65        | 54.58%±14.92%    |                  | 65        | 88.32%±2.61%     |                  | 65        | 80.73%±0.85%     |
|                  | 85        | 71.06%±2.05%     |                  | 85        | 90.05%±7.25%     |                  | 85        | 99.72%±1.25%     |                  | 85        | 99.01%±0.42%     |
| CW-1<br>Period 2 | 5         | 11.58%±2.83%     | CW-2<br>Period 2 | 5         | 50.3%±3.06%      | CW-3<br>Period 2 | 5         | 96.72%±0.57%     | CW-4<br>Period 2 | 5         | 95.56%±1.31%     |
|                  | 25        | 19.38%±2.65%     |                  | 25        | 74.52%±2.39%     |                  | 25        | 77.76%±1.71%     |                  | 25        | 74.39%±2.68%     |
|                  | 45        | 37.91%±1.18%     |                  | 45        | 80.0%±6.88%      |                  | 45        | 84.31%±0.61%     |                  | 45        | 80.12%±0.60%     |
|                  | 65        | 55.04%±7.33%     |                  | 65        | 66.73%±11.05%    |                  | 65        | 83.50%±1.41%     |                  | 65        | 85.13%±0.48%     |
|                  | 85        | 55.25%±7.62%     |                  | 85        | 88.95%±4.42%     |                  | 85        | 96.39%±1.38%     |                  | 85        | 93.49%±2.47%     |
| CW-1<br>Period 3 | 5         | 6.29%±4.15%      | CW-2<br>Period 3 | 5         | 30.14%±1.43%     | CW-3<br>Period 3 | 5         | 96.98%±0.75%     | CW-4<br>Period 3 | 5         | 95.79%±0.96%     |
|                  | 25        | 26.66%±2.65%     |                  | 25        | 56.19%±0.31%     |                  | 25        | 59.52%±3.61%     |                  | 25        | 64.88%±1.93%     |
|                  | 45        | 48.86%±2.67%     |                  | 45        | 87.65%±2.20%     |                  | 45        | 64.17%±2.62%     |                  | 45        | 65.97%±2.10%     |
|                  | 65        | 59.25%±5.66%     |                  | 65        | 71.02%±9.43%     |                  | 65        | 91.13%±2.13%     |                  | 65        | 85.99%±2.92%     |
|                  | 85        | 69.18%±5.91%     |                  | 85        | 87.33%±3.09%     |                  | 85        | 96.51%±0.26%     |                  | 85        | 95.00%±0.81%     |
